# Supplementary material for: Acid-catalysed α-O-4 aryl-ether bond cleavage in methanol/(aqueous) ethanol: understanding depolymerisation of a lignin model compound during organosolv pretreatment
Source: PubMed Central journal article supplement (PMC7338503; doi:10.1038/s41598-020-67787-9), 2020-07-06
Supplement: 41598_2020_67787_MOESM1_ESM.pdf [file 41598_2020_67787_MOESM1_ESM.pdf]

# ACID-CATALYSED $\alpha$ -O-4 ARYL-ETHER BONDS CLEAVAGE IN METHANOL AND (AQUEOUS) ETHANOL: DEPOLYMERISATION OF A LIGNIN MODEL COMPOUND DURING ORGANOSOLV PULPING

Edita Jasiukaitytė-Grojzdek, Matej Huš, Miha Grilc\*, Blaž Likozar\*

*Department of Catalysis and Chemical Reaction Engineering, National Institute of Chemistry Hajdrihova 19, SI-1000 Ljubljana, Slovenia*

## Material and methods

### Acidolysis experiments

**Table S1.** A list of the acidolysis experiments with BPE in ethanol, methanol or a 75 vol% ethanol/water mixture. The experiments were performed under an inert atmosphere of nitrogen at 1 MPa with H<sub>2</sub>SO<sub>4</sub> as a catalyst.

| Exp: | Solvent               | H <sub>2</sub> SO <sub>4</sub><br>[%] <sup>a</sup> | T<br>[°C] |
|------|-----------------------|----------------------------------------------------|-----------|
| 1    | EtOH                  | 0.5                                                | 180       |
| 2    | MeOH                  | 0.5                                                | 180       |
| 3    | EtOH/H <sub>2</sub> O | 0.5                                                | 180       |
| 4    | EtOH                  | 1.0                                                | 180       |
| 5    | MeOH                  | 1.0                                                | 180       |
| 6    | EtOH/H <sub>2</sub> O | 1.0                                                | 180       |
| 7    | EtOH                  | 1.5                                                | 180       |
| 8    | MeOH                  | 1.5                                                | 180       |
| 9    | EtOH/H <sub>2</sub> O | 1.5                                                | 180       |
| 10   | EtOH                  | 1.0                                                | 160       |
| 11   | MeOH                  | 1.0                                                | 160       |
| 12   | EtOH/H <sub>2</sub> O | 1.0                                                | 160       |
| 13   | EtOH                  | 1.0                                                | 200       |
| 14   | MeOH                  | 1.0                                                | 200       |
| 15   | EtOH/H <sub>2</sub> O | 1.0                                                | 200       |
| 16   | EtOH                  | 0                                                  | 200       |
| 17   | MeOH                  | 0                                                  | 200       |

<sup>a</sup> for 1 g of model compound 0.025 – 0.075 g of H<sub>2</sub>SO<sub>4</sub> in form of 2M solution were used, thus taking into account that wood contains approximately 20 % of lignin

\*Corresponding authors, Tel.: +386 1 4760 540; Fax: +386 1 4760 300; E-mail address: [miha.grilc@ki.si](mailto:miha.grilc@ki.si); [blaz.likozar@ki.si](mailto:blaz.likozar@ki.si)

## Results and Discussion

### Reaction mechanism

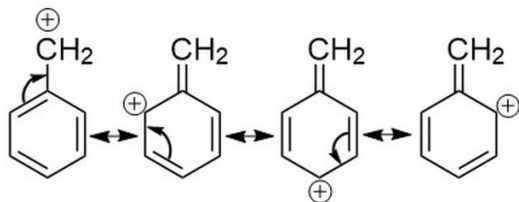

**Figure S1.** Stabilization of the benzyl carbocation by the resonance effect.

### The effect of temperature

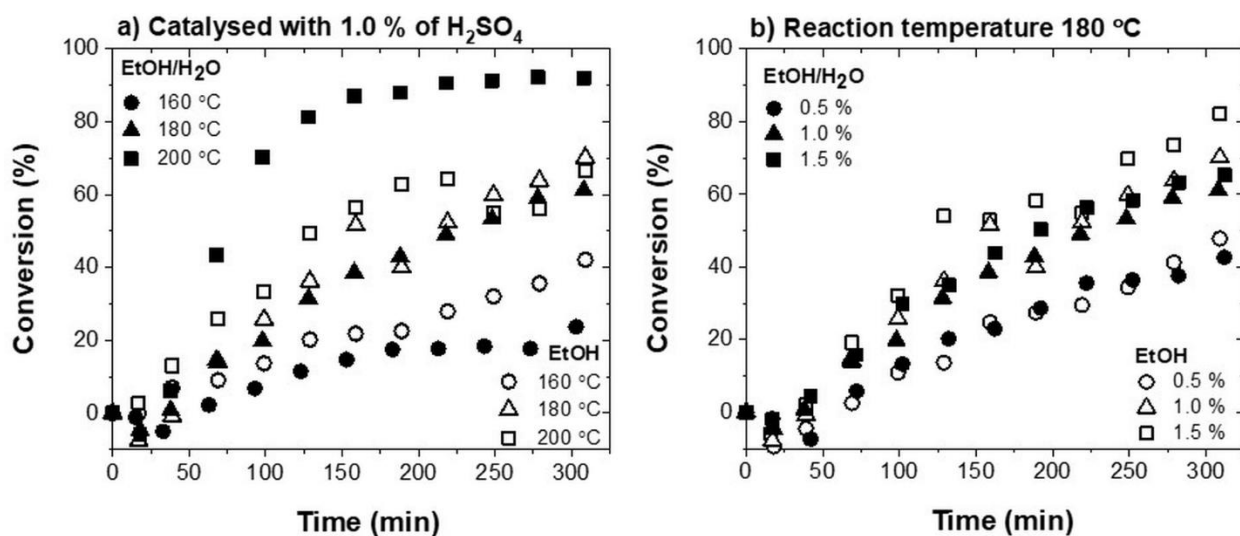

**Figure S2.** Conversion of benzyl phenyl ether (BPE) as a function of time in ethanol (EtOH)\* and 75 vol% ethanol/water (EtOH/H<sub>2</sub>O): a) at 160 °C, 180 °C, 200 °C with 1 % of H<sub>2</sub>SO<sub>4</sub>. b) at 180 °C with 0.5 %, 1.0 % and 1.5 % of H<sub>2</sub>SO<sub>4</sub>; \*BPE conversions in EtOH are shown again for easier comparison.

**ATR/FT-IR spectroscopic analysis**

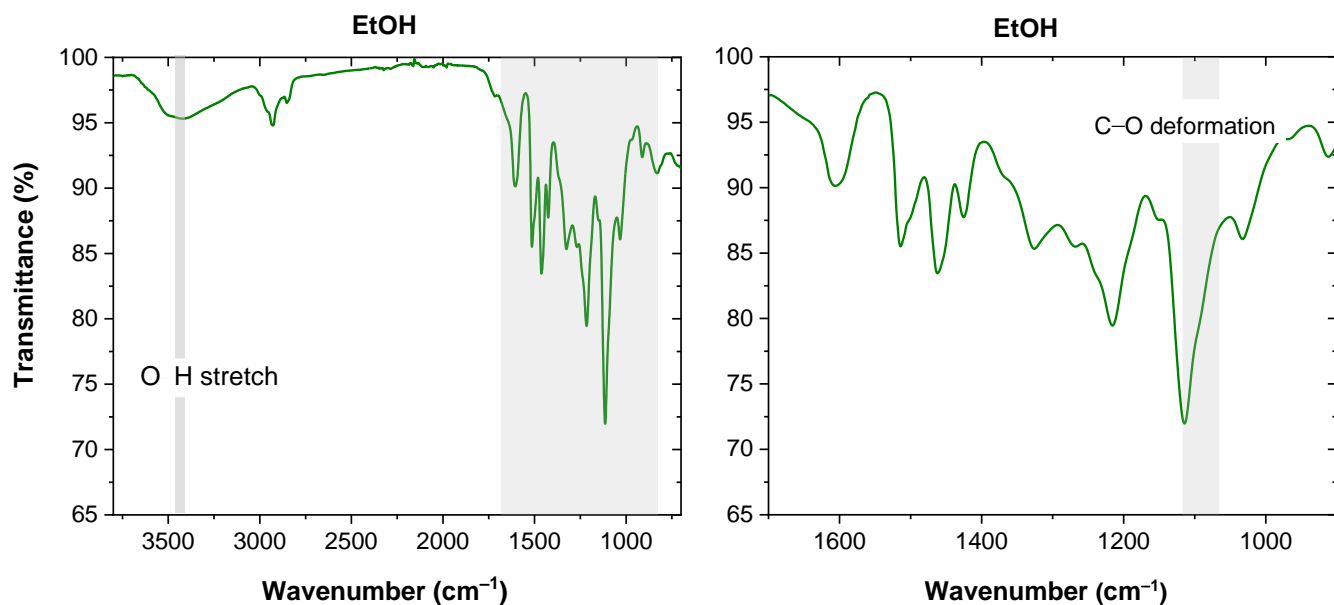

**Figure S3.** ATR-FTIR spectra of lignin isolated in EtOH with the enlarged highlighted area of the original spectra.

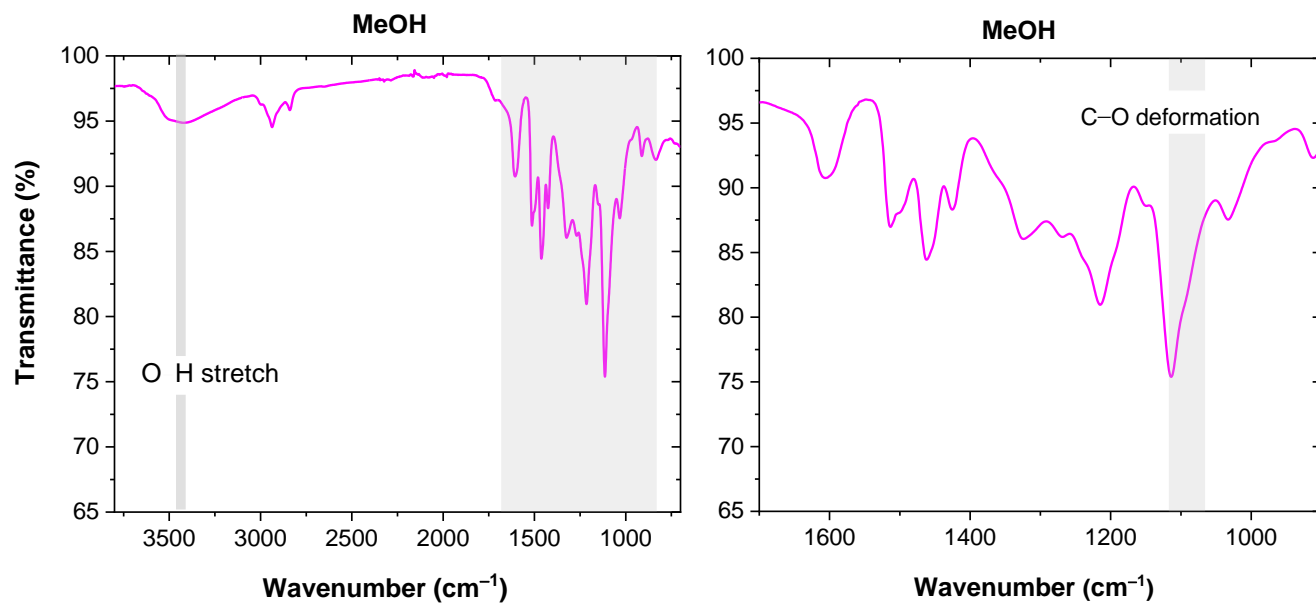

**Figure S4.** ATR-FTIR spectra of lignin isolated in MeOH with the enlarged highlighted area of the original spectra.

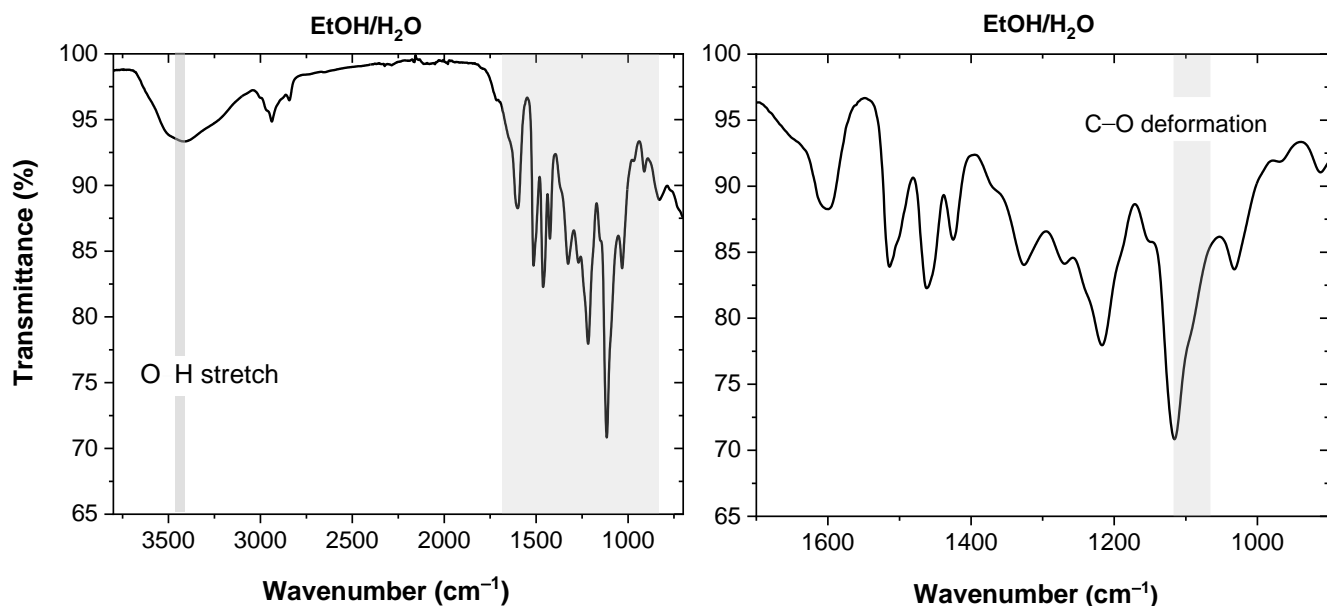

**Figure S5.** ATR-FTIR spectra of lignin isolated in EtOH/H<sub>2</sub>O with the enlarged highlighted area of the original spectra.

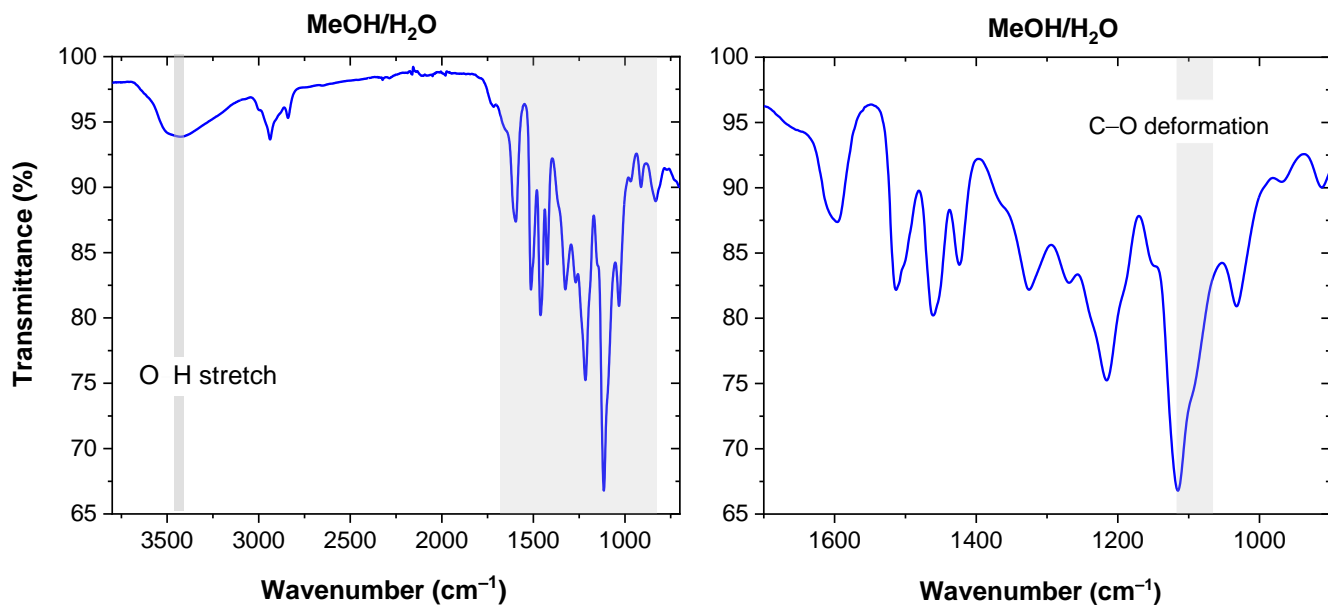

**Figure S6.** ATR-FTIR spectra of lignin isolated in MeOH/H<sub>2</sub>O with the enlarged highlighted area of the original spectra.

## Fractionation

**Table S2.** Lignin isolation in different solvents.<sup>a</sup>

| Exp. | Solvent               | Residue<br>[%] | Lignin<br>yield <sup>b</sup><br>[%] | Average<br><i>M<sub>w</sub></i><br>[Da] |
|------|-----------------------|----------------|-------------------------------------|-----------------------------------------|
| 1    | MeOH                  | 39.3           | 70.6                                | 2150                                    |
| 2    | EtOH                  | 42.9           | 64.4                                | 2050                                    |
| 3    | MeOH/H <sub>2</sub> O | 43.7           | 76.0                                | 2300                                    |
| 4    | EtOH/H <sub>2</sub> O | 43.3           | 83.4                                | 2700                                    |

<sup>a</sup> Reaction conditions: 180 °C, 60 min, 1.0 % of H<sub>2</sub>SO<sub>4</sub> (based on dry matter).

<sup>b</sup> Lignin content in beech wood was considered to be 24.4 %.<sup>29</sup>

<sup>c</sup> 75 vol% (m)ethanol/water.
